# Supplementary material for: The clinical utility and epidemiological impact of self-testing for SARS-CoV-2 using antigen detecting diagnostics: a systematic review and meta-analysis
Source: bioRxiv or medRxiv preprint supplement (doi:10.1101/2022.07.03.22277183), 2022-07-05
Supplement: Supplementary file [file media-1.pdf]

# S1 Fig - Newcastle Ottawa Scale assessment

| Author Journal Year / Dataset              | Selection | Comparability | Outcome | Overall      |
|--------------------------------------------|-----------|---------------|---------|--------------|
| Downs JIF 2021 / 1                         | ⊕         |               |         | <b>1 / 9</b> |
| Hirst OFID 2021 / 1                        | ⊕ ⊕       |               | ⊕ ⊕ ⊕   | <b>5 / 9</b> |
| Hirst OFID 2021 / 2                        | ⊕ ⊕       |               | ⊕ ⊕     | <b>4 / 9</b> |
| Hoehl Dtsch Arztebl 2021 / 1               | ⊕         |               | ⊕       | <b>2 / 9</b> |
| Kheiroddin Front. Pediatr. 2021 / 1        | ⊕         | ⊕             | ⊕ ⊕     | <b>4 / 9</b> |
| Lamb JIF 2021 / 1                          | ⊕         | ⊕             | ⊕       | <b>3 / 9</b> |
| Love medRxiv 2021 / 1                      | ⊕ ⊕       |               | ⊕       | <b>3 / 9</b> |
| Stohr CMI 2021 / 1                         | ⊕ ⊕       |               | ⊕       | <b>3 / 9</b> |
| Stohr CMI 2021 / 2                         | ⊕ ⊕       |               | ⊕       | <b>3 / 9</b> |
| Tulloch Age Ageing 2021 / 1                | ⊕         |               | ⊕       | <b>2 / 9</b> |
| University of Liverpool [website] 2021 / 1 | ⊕         |               | ⊕       | <b>2 / 9</b> |
| University of Liverpool [website] 2021 / 2 | ⊕ ⊕       |               | ⊕ ⊕ ⊕   | <b>5 / 9</b> |
| Wachinger BMJ peads open 2021 / 1          | ⊕         |               | ⊕       | <b>2 / 9</b> |
| Wachinger BMJ peads open 2021 / 2          | ⊕         |               | ⊕ ⊕     | <b>3 / 9</b> |
| Willeit Eurosurveillance 2021 / 1          | ⊕         |               | ⊕ ⊕     | <b>3 / 9</b> |
| Willeit Eurosurveillance 2021 / 2          | ⊕         |               | ⊕ ⊕     | <b>3 / 9</b> |
| Willeit Eurosurveillance 2021 / 3          | ⊕         |               | ⊕ ⊕     | <b>3 / 9</b> |

*Red mark: indicates an overall high risk of bias. Yellow mark: indicates an overall medium risk of bias. Green mark: indicates on overall low risk of bias.*
